# Supplementary material for: Upscaling methods used in ex ante life cycle assessment of emerging technologies: a review
Source: Springer Nature journal article supplement (doi:10.1007/s11367-020-01796-8), 2020-08-06
Supplement: MOESM2 [file 18255282]

## Sheet: Title
THE INTERNATIONAL JOURNAL OF LIFE CYCLE ASSESSMENT
ELECTRONIC SUPPLEMENTARY MATERIAL
Up-scaling methods used in ex-ante life cycle assessment of emerging technologies: a review
Natalya Tsoy1*, Bernhard Steubing1, Coen van der Giesen1 & Jeroen Guinée1
1Institute of Environmental Sciences (CML), Leiden University, Einsteinweg 2, 2333 Leiden, CC, the Netherlands
*Corresponding author: Natalya Tsoy; E-mail: n.tsoy@cml.leidenuniv.nl

## Sheet: Search results
	#	AU	TI	SO	TC	Z9	SN	EI	PD	PY	VL	IS	BP	EP	AR	DI	UT	PM
	1	Makova, T; Meylan, G; Powell, JT; Shepon, A	Better than bottled water?-Energy and climate change impacts of on-the-go drinking water stations	RESOURCES CONSERVATION AND RECYCLING	0	0	0921-3449	1879-0658	APR	2019	143		320	328		10.1016/j.resconrec.2016.11.010	WOS:000458222600034
	2	Parsons, S; Abeln, F; McManus, MC; Chuck, CJ	Techno-economic analysis (TEA) of microbial oil production from waste resources as part of a biorefinery concept: assessment at multiple scales under uncertainty	JOURNAL OF CHEMICAL TECHNOLOGY AND BIOTECHNOLOGY	1	1	0268-2575	1097-4660	MAR	2019	94	3	701	711		10.1002/jctb.5811	WOS:000458295400005
	3	de Kock, L; Russo, V; von Blottnitz, H	Carbon intensive but decarbonising quickly? Retrospective and prospective Life Cycle Assessments of South African pome fruit	JOURNAL OF CLEANER PRODUCTION	0	0	0959-6526	1879-1786	MAR 1	2019	212		139	150		10.1016/j.jclepro.2018.12.026	WOS:000457952500013
	4	Munoz, I; Portillo, F; Rosiek, S; Battles, FJ; Martinez-Del-Rio, J; Acasuso, I; Piergrossi, V; De Sanctis, M; Chimienti, S; Di Iaconi, C	Prospective environmental and economic assessment of solar-assisted thermal energy recovery from wastewater through a sequencing batch biofilter granular reactor	JOURNAL OF CLEANER PRODUCTION	0	0	0959-6526	1879-1786	MAR 1	2019	212		1300	1309		10.1016/j.jclepro.2018.12.074	WOS:000457952500108
	5	Fertitta-Roberts, C; Oikawa, PY; Jenerette, GD	Evaluating the GHG mitigation-potential of alternate wetting and drying in rice through life cycle assessment	SCIENCE OF THE TOTAL ENVIRONMENT	0	0	0048-9697	1879-1026	2025-02-01	2019	653		1343	1353		10.1016/j.scitotenv.2018.10.327	WOS:000458626800131	30759574
	6	Lokesh, K; West, C; Kuylenstierna, JC; Fan, JJ; Budarin, V; Priecel, P; Lopez-Sanchez, JA; Clark, JH	Economic and agronomic impact assessment of wheat straw based alkyl polyglucoside produced using green chemical approaches	JOURNAL OF CLEANER PRODUCTION	0	0	0959-6526	1879-1786	2001-02-01	2019	209		283	296		10.1016/j.jclepro.2018.10.220	WOS:000457351900025
	7	Peng, ST; Li, T; Wang, Y; Liu, ZC; Tan, GZ; Zhang, HC	Prospective Life Cycle Assessment Based on System Dynamics Approach: A Case Study on the Large-Scale Centrifugal Compressor	JOURNAL OF MANUFACTURING SCIENCE AND ENGINEERING-TRANSACTIONS OF THE ASME	0	0	1087-1357	1528-8935	FEB	2019	141	2			21003	10.1115/1.4041950	WOS:000455219600004
	8	Mendoza, JMF; Gallego-Schmid, A; Rivera, XCS; Rieradevall, J; Azapagic, A	Sustainability assessment of home-made solar cookers for use in developed countries	SCIENCE OF THE TOTAL ENVIRONMENT	0	0	0048-9697	1879-1026	2015-01-01	2019	648		184	196		10.1016/j.scitotenv.2018.08.125	WOS:000447805500019	30114589
	9	Proctor, E; Hooley, C; Morse, A; McCrary, S; Kim, H; Kohl, PL	Intermediary/purveyor organizations for evidence-based interventions in the US child mental health: characteristics and implementation strategies	IMPLEMENTATION SCIENCE	0	0	1748-5908		2014-01-01	2019	14				3	10.1186/s13012-018-0845-3	WOS:000455623000001	30642342
	10	Mazzoni, R; Cesari, C; Zanotti, V; Lucarelli, C; Tabanelli, T; Puzzo, F; Passarini, F; Neri, E; Marani, G; Prati, R; Vigano, F; Conversano, A; Cavani, F	Catalytic Biorefining of Ethanol from Wine Waste to Butanol and Higher Alcohols: Modeling the Life Cycle Assessment and Process Design	ACS SUSTAINABLE CHEMISTRY & ENGINEERING	0	0	2168-0485		2007-01-01	2019	7	1	224	237		10.1021/acssuschemeng.8b02959	WOS:000455288800025
	11	Chen, IC; Hamano, H; Iwasaki, H; Yamada, K	An Economic-Environmental Analysis of Lithium Ion Batteries Based on Process Design and a Manufacturing Equipment Database	JOURNAL OF CHEMICAL ENGINEERING OF JAPAN	0	0	0021-9592		JAN	2019	52	1	111	120		10.1252/jcej.17we302	WOS:000457734000014
	12	Schulze, R; Abbasalizadeh, A; Bulach, W; Schebek, L; Buchert, M	An Ex-ante LCA Study of Rare Earth Extraction from NdFeB Magnet Scrap Using Molten Salt Electrolysis	JOURNAL OF SUSTAINABLE METALLURGY	0	0	2199-3823	2199-3831	DEC	2018	4	4	493	505		10.1007/s40831-018-0198-9	WOS:000452341600008
	13	Arvidsson, R; Tillman, AM; Sanden, BA; Janssen, M; Nordelof, A; Kushnir, D; Molander, S	Environmental Assessment of Emerging Technologies: Recommendations for Prospective LCA	JOURNAL OF INDUSTRIAL ECOLOGY	2	2	1088-1980	1530-9290	DEC	2018	22	6	1286	1294		10.1111/jiec.12690	WOS:000447649500001
	14	Karatum, O; Bhuiya, MMH; Carroll, MK; Anderson, AM; Plata, DL	Life Cycle Assessment of Aerogel Manufacture on Small and Large Scales: Weighing the Use of Advanced Materials in Oil Spill Remediation	JOURNAL OF INDUSTRIAL ECOLOGY	0	0	1088-1980	1530-9290	DEC	2018	22	6	1365	1377		10.1111/jiec.12720	WOS:000447649500008
	15	Salas, DA; Ramirez, AD; Ulloa, N; Baykara, H; Boero, AJ	Life cycle assessment of geopolymer concrete	CONSTRUCTION AND BUILDING MATERIALS	0	0	0950-0618	1879-0526	1930-11-01	2018	190		170	177		10.1016/j.conbuildmat.2018.09.123	WOS:000451104900015
	16	Louis, JN; Allard, S; Debusschere, V; Mima, S; Tuan, TQ; Hadjsaid, N	Environmental impact indicators for the electricity mix and network development planning towards 2050-A POLES and EUTGRID model	ENERGY	1	1	0360-5442	1873-6785	2015-11-01	2018	163		618	628		10.1016/j.energy.2018.08.093	WOS:000448097800045
	17	Meng, FX; Dillingham, G	Life Cycle Analysis of Natural Gas-Fired Distributed Combined Heat and Power versus Centralized Power Plant	ENERGY & FUELS	0	0	0887-0624	1520-5029	NOV	2018	32	11	11731	11741		10.1021/acs.energyfuels.8b02949	WOS:000451101300066
	18	Tran, NN; Tisma, M; Budzaki, S; McMurchie, EJ; Gonzalez, OMM; Hessel, V; Ngothai, Y	Scale-up and economic analysis of biodiesel production from recycled grease trap waste	APPLIED ENERGY	2	2	0306-2619	1872-9118	2001-11-01	2018	229		142	150		10.1016/j.apenergy.2018.07.106	WOS:000449891500012
	19	Gonzalez-Garcia, S; Morales, PC; Gullon, B	Estimating the environmental impacts of a brewery waste-based biorefinery: Bio-ethanol and xylooligosaccharides joint production case study	INDUSTRIAL CROPS AND PRODUCTS	0	0	0926-6690	1872-633X	2001-11-01	2018	123		331	340		10.1016/j.indcrop.2018.07.003	WOS:000447103900038
	20	Lu-Chau, TA; Martinez-Patino, JC; Gullon, B; Garcia-Torreiro, M; Moreira, MT; Lema, JM; Eibes, G	Scale-up and economic analysis of the production of ligninolytic enzymes from a side-stream of the organosolv process	JOURNAL OF CHEMICAL TECHNOLOGY AND BIOTECHNOLOGY	0	0	0268-2575	1097-4660	NOV	2018	93	11	3125	3134		10.1002/jctb.5664	WOS:000446561600004
	21	Arias, A; Salim, I; Pedrouso, A; Morales, N; Mosquera-Corral, A; Vazquez-Padin, JR; Rogalla, F; Feijoo, G; Moreira, MT	Bottom-up approach in the assessment of environmental impacts and costs of an innovative anammox-based process for nitrogen removal	JOURNAL OF ENVIRONMENTAL MANAGEMENT	1	1	0301-4797	1095-8630	2001-11-01	2018	225		112	119		10.1016/j.jenvman.2018.07.070	WOS:000445988400012	30075304
	22	Joyce, PJ; Hertel, T; Goronovski, A; Tkaczyk, AH; Pontikes, Y; Bjorklund, A	Identifying hotspots of environmental impact in the development of novel ik) inorganic polymer paving blocks from bauxite residue	RESOURCES CONSERVATION AND RECYCLING	3	3	0921-3449	1879-0658	NOV	2018	138		87	98		10.1016/j.resconrec.2018.07.006	WOS:000444789400010
	23	Gonzalez-Garcia, S; Argiz, L; Miguez, P; Gullon, B	Exploring the production of bio-succinic acid from apple pomace using an environmental approach	CHEMICAL ENGINEERING JOURNAL	0	0	1385-8947	1873-3212	OCT 15	2018	350		982	991		10.1016/j.cej.2018.06.052	WOS:000437093000098
	24	Zhu, CB; Zhai, XQ; Wang, JH; Han, DS; Li, YH; Xi, YM; Tang, YJ; Chi, ZY	Large-scale cultivation of Spirulina in a floating horizontal photobioreactor without aeration or an agitation device	APPLIED MICROBIOLOGY AND BIOTECHNOLOGY	1	1	0175-7598	1432-0614	OCT	2018	102	20	8979	8987		10.1007/s00253-018-9258-0	WOS:000445604600031	30056515
	25	Fan, YV; Klemes, JJ; Lee, CT; Perry, S	Anaerobic digestion of municipal solid waste: Energy and carbon emission footprint	JOURNAL OF ENVIRONMENTAL MANAGEMENT	1	1	0301-4797	1095-8630	OCT 1	2018	223		888	897		10.1016/j.jenvman.2018.07.005	WOS:000442057500091	29996113
	26	Weber, S; Peters, JF; Baumann, M; Weil, M	Life Cycle Assessment of a Vanadium Redox Flow Battery	ENVIRONMENTAL SCIENCE & TECHNOLOGY	1	1	0013-936X	1520-5851	2018-09-01	2018	52	18	10864	10873		10.1021/acs.est.8b02073	WOS:000445441000070	30132664
	27	Mehmeti, A; McPhail, SJ; Ulgiati, S	Life cycle inventory data and metrics for high-temperature fuel cells: A streamlined decision-support tool and case study application	ENERGY	2	2	0360-5442	1873-6785	2015-09-01	2018	159		1195	1205		10.1016/j.energy.2018.06.139	WOS:000442973300102
	28	Nunes, AO; Viana, LR; Guineheuc, PM; Moris, VAD; de Paiva, JMF; Barna, R; Soudais, Y	Life cycle assessment of a steam thermolysis process to recover carbon fibers from carbon fiber-reinforced polymer waste	INTERNATIONAL JOURNAL OF LIFE CYCLE ASSESSMENT	3	3	0948-3349	1614-7502	SEP	2018	23	9	1825	1838		10.1007/s11367-017-1416-6	WOS:000441789600009
	29	Lettner, M; Solt, P; Rossiger, B; Pufky-Heinrich, D; Jaaskelainen, AS; Schwarzbauer, P; Hesser, F	From Wood to Resin-Identifying Sustainability Levers through Hotspotting Lignin Valorisation Pathways	SUSTAINABILITY	0	0	2071-1050		AUG	2018	10	8			2745	10.3390/su10082745	WOS:000446767700161
	30	Grube, T; Dore, L; Hoffrichter, A; Hombach, LE; Raths, S; Robinius, M; Nobis, M; Schiebahn, S; Tietze, V; Schnettler, A; Walther, G; Stolten, D	An option for stranded renewables: electrolytichydrogen in future energy systems	SUSTAINABLE ENERGY & FUELS	2	2	2398-4902		JUL	2018	2	7	1500	1515		10.1039/c8se00008e	WOS:000436519000011
	31	Fuess, LT; Klein, BC; Chagas, MF; Rezende, MCAF; Garcia, ML; Bonomi, A; Zaiat, M	Diversifying the technological strategies for recovering bioenergy from the two-phase anaerobic digestion of sugarcane vinasse: An integrated techno-economic and environmental approach	RENEWABLE ENERGY	6	6	0960-1481		JUL	2018	122		674	687		10.1016/j.renene.2018.02.003	WOS:000428491100063
	32	Ravikumar, D; Seager, TP; Cucurachi, S; Prado, V; Mutel, C	Novel Method of Sensitivity Analysis Improves the Prioritization of Research in Anticipatory Life Cycle Assessment of Emerging Technologies	ENVIRONMENTAL SCIENCE & TECHNOLOGY	1	1	0013-936X	1520-5851	2005-06-01	2018	52	11	6534	6543		10.1021/acs.est.7b04517	WOS:000434892900049	29734807
	33	De Marco, I; Iannone, R; Miranda, S; Riemma, S	An environmental study on starch aerogel for drug delivery applications: effect of plant scale-up	INTERNATIONAL JOURNAL OF LIFE CYCLE ASSESSMENT	2	2	0948-3349	1614-7502	JUN	2018	23	6	1228	1239		10.1007/s11367-017-1351-6	WOS:000434070400006
	34	Piceinno, F; Hischier, R; Seeger, S; Som, C	Eco-Efficient Process Improvement at the Early Development Stage: Identifying Environmental and Economic Process Hotspots for Synergetic Improvement Potential	ENVIRONMENTAL SCIENCE & TECHNOLOGY	0	0	0013-936X	1520-5851	MAY 15	2018	52	10	5959	5967		10.1021/acs.est.8b01197	WOS:000432417400049	29630826
	35	Navas-Anguita, Z; Garcia-Gusano, D; Iribarren, D	Prospective Life Cycle Assessment of the Increased Electricity Demand Associated with the Penetration of Electric Vehicles in Spain	ENERGIES	0	0	1996-1073		MAY	2018	11	5			1185	10.3390/en11051185	WOS:000435610300163
	36	Paixao, SM; Alves, L; Pacheco, R; Silva, CM	Evaluation of Jerusalem artichoke as a sustainable energy crop to bioethanol: energy and CO(2)eq emissions modeling for an industrial scenario	ENERGY	2	2	0360-5442	1873-6785	MAY 1	2018	150		468	481		10.1016/j.energy.2018.02.145	WOS:000431748400037
	37	Righi, S; Baioli, F; Dal Pozzo, A; Tugnoli, A	Integrating Life Cycle Inventory and Process Design Techniques for the Early Estimate of Energy and Material Consumption Data	ENERGIES	2	2	1996-1073		APR	2018	11	4			970	10.3390/en11040970	WOS:000434703400281
	38	Mandal, S; Shurin, JB; Efroymson, RA; Mathews, TJ	Heterogeneity in Nitrogen Sources Enhances Productivity and Nutrient Use Efficiency in Algal Polycultures	ENVIRONMENTAL SCIENCE & TECHNOLOGY	1	1	0013-936X	1520-5851	MAR 20	2018	52	6	3769	3776		10.1021/acs.est.7b05318	WOS:000428219900053	29466661
	39	Tan, LH; Mandley, SJ; Peijnenburg, W; Waaijers-van der Loop, SL; Giesen, D; Legradi, JB; Shen, L	Combining ex-ante LCA and EHS screening to assist green design: A case study of cellulose nanocrystal foam	JOURNAL OF CLEANER PRODUCTION	1	1	0959-6526	1879-1786	MAR 20	2018	178		494	506		10.1016/j.jclepro.2017.12.243	WOS:000425558600045
	40	Piccinno, F; Hischier, R; Seeger, S; Som, C	Predicting the environmental impact of a future nanocellulose production at industrial scale: Application of the life cycle assessment scale-up framework	JOURNAL OF CLEANER PRODUCTION	9	9	0959-6526	1879-1786	2010-02-01	2018	174		283	295		10.1016/j.jclepro.2017.10.226	WOS:000424727100028
	41	Kazemi, A; Bahramifar, N; Heydari, A; Olsen, SI	Life cycle assessment of nanoadsorbents at early stage technological development	JOURNAL OF CLEANER PRODUCTION	1	1	0959-6526	1879-1786	2010-02-01	2018	174		527	537		10.1016/j.jclepro.2017.10.245	WOS:000424727100048
	42	Zhu, YC; Waqas, MA; Li, YE; Zou, XX; Jiang, DF; Wilkes, A; Qin, XB; Gao, QZ; Wan, YF; Hasbagan, G	Large-scale farming operations are win-win for grain production, soil carbon storage and mitigation of greenhouse gases	JOURNAL OF CLEANER PRODUCTION	0	0	0959-6526	1879-1786	2020-01-01	2018	172		2143	2152		10.1016/j.jclepro.2017.11.205	WOS:000423002200075
	43	Moazzem, S; Daver, F; Crossin, E; Wang, LJ	Assessing environmental impact of textile supply chain using life cycle assessment methodology	JOURNAL OF THE TEXTILE INSTITUTE	0	0	0040-5000	1754-2340		2018	109	12	1574	1585		10.1080/00405000.2018.1434113	WOS:000455589700006
	44	Moncao, FS; Sartori, ML; Veloso, RV; Pantoja, LD; dos Santos, AS	Microalgae and Biofuels: Integration of Productive Chains	REVISTA VIRTUAL DE QUIMICA	0	0	1984-6835			2018	10	4	999	1017		10.21577/1984-6835.20180071	WOS:000443746200018
	45	Guerra, JP; Cardoso, FH; Nogueira, A; Kulay, L	Thermodynamic and Environmental Analysis of Scaling up Cogeneration Units Driven by Sugarcane Biomass to Enhance Power Exports	ENERGIES	0	0	1996-1073		JAN	2018	11	1			73	10.3390/en11010073	WOS:000424397600073
	46	Inkeri, E; Tynjala, T; Laari, A; Hyppanen, T	Dynamic one-dimensional model for biological methanation in a stirred tank reactor	APPLIED ENERGY	1	1	0306-2619	1872-9118	2001-01-01	2018	209		95	107		10.1016/j.apenergy.2017.10.073	WOS:000418968500009
	47	Cossutta, M; McKechnie, J; Pickering, SJ	A comparative LCA of different graphene production routes	GREEN CHEMISTRY	2	2	1463-9262	1463-9270	2021-12-01	2017	19	24	5874	5884		10.1039/c7gc02444d	WOS:000417756500017
	48	Pehl, M; Arvesen, A; Humpenoder, F; Popp, A; Hertwich, EG; Luderer, G	Understanding future emissions from low-carbon power systems by integration of life-cycle assessment and integrated energy modelling	NATURE ENERGY	12	12	2058-7546		DEC	2017	2	12	939	945		10.1038/s41560-017-0032-9	WOS:000418244000004
	49	Mohareb, E; Heller, M; Novak, P; Goldstein, B; Fonoll, X; Raskin, L	Considerations for reducing food system energy demand while scaling up urban agriculture	ENVIRONMENTAL RESEARCH LETTERS	1	1	1748-9326		DEC	2017	12	12			125004	10.1088/1748-9326/aa889b	WOS:000417531000002
	50	Kolster, C; Masnadi, MS; Krevor, S; Dowell, NM; Brandt, AR	CO2 enhanced oil recovery: a catalyst for gigatonne-scale carbon capture and storage deployment?	ENERGY & ENVIRONMENTAL SCIENCE	6	6	1754-5692	1754-5706	DEC	2017	10	12	2594	2608		10.1039/c7ee02102j	WOS:000417255900012
	51	Lovarelli, D; Bacenetti, J	Seedbed preparation for arable crops: Environmental impact of alternative mechanical solutions	SOIL & TILLAGE RESEARCH	4	4	0167-1987	1879-3444	DEC	2017	174		156	168		10.1016/j.still.2017.06.006	WOS:000412265800017
	52	Prapainainar, P; Boonrod, B; Phetarporn, V; Saibautrong, W; Juntarungsee, S; Tiavirat, K; Mungcharoen, T	Evaluating the environmental impacts of graft copolymer prepared by conventional emulsion polymerization, electron beam irradiation, and gamma ray irradiation through life cycle assessment	JOURNAL OF CLEANER PRODUCTION	2	2	0959-6526	1879-1786	2020-11-01	2017	167		1038	1047		10.1016/j.jclepro.2016.10.048	WOS:000413128100090
	53	Telsnig, T; Weinrebe, G; Finkbeiner, J; Eltrop, L	Life cycle assessment of a future central receiver solar power plant and autonomous operated heliostat concepts	SOLAR ENERGY	0	0	0038-092X		2015-11-01	2017	157		187	200		10.1016/j.solener.2017.08.018	WOS:000418314500017
	54	Perez-Lopez, P; de Vree, JH; Feijoo, G; Bosma, R; Barbosa, MJ; Moreira, MT; Wijffels, RH; van Boxtel, AJB; Kleinegris, DMM	Comparative life cycle assessment of real pilot reactors for microalgae cultivation in different seasons	APPLIED ENERGY	5	5	0306-2619	1872-9118	2001-11-01	2017	205		1151	1164		10.1016/j.apenergy.2017.08.102	WOS:000414817100094
	55	Aryapratama, R; Janssen, M	Prospective life cycle assessment of bio-based adipic acid production from forest residues	JOURNAL OF CLEANER PRODUCTION	2	2	0959-6526	1879-1786	OCT 15	2017	164		434	443		10.1016/j.jclepro.2017.06.222	WOS:000409290700041
	56	Slotte, M; Zevenhoven, R	Energy Efficiency and Scalability of Metallic Nanoparticle Production Using Arc/Spark Discharge	ENERGIES	2	2	1996-1073		OCT	2017	10	10			1605	10.3390/en10101605	WOS:000414578400160
	57	Arvidsson, R; Molander, S	Prospective Life Cycle Assessment of Epitaxial Graphene Production at Different Manufacturing Scales and Maturity	JOURNAL OF INDUSTRIAL ECOLOGY	3	3	1088-1980	1530-9290	OCT	2017	21	5	1153	1164		10.1111/jiec.12526	WOS:000413579000009
	58	Dandres, T; Vandromme, N; Obrekht, G; Wong, A; Nguyen, KK; Lemieux, Y; Cheriet, M; Samson, R	Consequences of Future Data Center Deployment in Canada on Electricity Generation and Environmental Impacts A 2015-2030 Prospective Study	JOURNAL OF INDUSTRIAL ECOLOGY	1	1	1088-1980	1530-9290	OCT	2017	21	5	1312	1322		10.1111/jiec.12515	WOS:000413579000022
	59	Peters, JF; Weil, M	Aqueous hybrid ion batteries - An environmentally friendly alternative for stationary energy storage?	JOURNAL OF POWER SOURCES	3	3	0378-7753	1873-2755	OCT 1	2017	364		258	265		10.1016/j.jpowsour.2017.08.041	WOS:000412250800029
	60	Villares, M; Isildar, A; van der Giesen, C; Guinee, J	Does ex ante application enhance the usefulness of LCA? A case study on an emerging technology for metal recovery from e-waste	INTERNATIONAL JOURNAL OF LIFE CYCLE ASSESSMENT	2	2	0948-3349	1614-7502	OCT	2017	22	10	1618	1633		10.1007/s11367-017-1270-6	WOS:000410058000010
	61	Zhou, Y; Lee, CK; Sharratt, P	Bridging the Gap from Pilot Plant Experimental Records to Life Cycle Inventory	INDUSTRIAL & ENGINEERING CHEMISTRY RESEARCH	1	1	0888-5885		2020-09-01	2017	56	37	10393	10412		10.1021/acs.iecr.7b00360	WOS:000411659400018
	62	Kulak, M; Shah, N; Sawant, N; Unger, N; King, H	Technology choices in scaling up sanitation can significantly affect greenhouse gas emissions and the fertiliser gap in India	JOURNAL OF WATER SANITATION AND HYGIENE FOR DEVELOPMENT	1	1	2043-9083		SEP	2017	7	3	466	476		10.2166/washdev.2017.005	WOS:000411250500013
	63	Dehan, V; Bourgeat-Lami, E; D'Agosto, F; Duffy, B; Fortini, A; Hilton, S; Krassa, K; Keddie, JL; Koh, ML; Lansalot, M; Lee, M; de la Haye, JL; Martin-Fabiani, I; Mantzaridis, C; Mazeffa, DP; Sear, RP; Schulz, M; Sibbald, M; Skerry, B; Thomas, B	High-performance water-based barrier coatings for the corrosion protection of structural steel	STEEL CONSTRUCTION-DESIGN AND RESEARCH	0	0	1867-0520	1867-0539	AUG	2017	10	3	255	259		10.1002/stco.201710034	WOS:000407479500011
	64	Salkuyeh, YK; Saville, BA; MacLean, HL	Techno-economic analysis and life cycle assessment of hydrogen production from natural gas using current and emerging technologies	INTERNATIONAL JOURNAL OF HYDROGEN ENERGY	10	10	0360-3199	1879-3487	2027-07-01	2017	42	30	18894	18909		10.1016/j.ijhydene.2017.05.219	WOS:000408297500014
	65	Valentino, F; Morgan-Sagastume, F; Campanari, S; Villano, M; Werker, A; Majone, M	Carbon recovery from wastewater through bioconversion into biodegradable polymers	NEW BIOTECHNOLOGY	24	26	1871-6784	1876-4347	2025-07-01	2017	37		9	23		10.1016/j.nbt.2016.05.007	WOS:000401208000003	27288751
	66	Halloran, A; Hanboonsong, Y; Roos, N; Bruun, S	Life cycle assessment of cricket farming in north-eastern Thailand	JOURNAL OF CLEANER PRODUCTION	11	13	0959-6526	1879-1786	2010-07-01	2017	156		83	94		10.1016/j.jclepro.2017.04.017	WOS:000403028500008
	67	Itten, R; Stucki, M	Highly Efficient 3rd Generation Multi-Junction Solar Cells Using Silicon Heterojunction and Perovskite Tandem: Prospective Life Cycle Environmental Impacts	ENERGIES	2	2	1996-1073		JUL	2017	10	7			841	10.3390/en10070841	WOS:000406700200012
	68	Wang, JY; Zhao, J; Wang, YZ; Deng, SA; Sun, TW; Li, KX	Application potential of solar-assisted post-combustion carbon capture and storage (CCS) in China: A life cycle approach	JOURNAL OF CLEANER PRODUCTION	7	7	0959-6526	1879-1786	2015-06-01	2017	154		541	552		10.1016/j.jclepro.2017.04.021	WOS:000401201900049
	69	Teixeira, ARS; Willig, G; Couvreur, J; Flourat, AL; Peru, AAM; Ferchaud, P; Ducatel, H; Allais, F	From bench scale to kilolab production of renewable ferulic acid-based bisphenols: optimisation and evaluation of different purification approaches towards technical feasibility and process environmental sustainability	REACTION CHEMISTRY & ENGINEERING	0	0	2058-9883		2001-06-01	2017	2	3	406	419		10.1039/c7re00017k	WOS:000403324900018
	70	Freire, ALF; de Araujo, CP; Rosa, MD; Neto, JAD; de Figueiredo, MCB	Environmental assessment of bioproducts in development stage: The case of fiberboards made from coconut residues	JOURNAL OF CLEANER PRODUCTION	0	0	0959-6526	1879-1786	JUN	2017	153	1	230	241		10.1016/j.jclepro.2017.03.100	WOS:000401042100020
	71	Teymouri, A; Kumar, S; Barbera, E; Sforza, E; Bertucco, A; Morosinotto, T	Integration of Biofuels Intermediates Production and Nutrients Recycling in the Processing of a Marine Algae	AICHE JOURNAL	14	14	0001-1541	1547-5905	MAY	2017	63	5	1494	1502		10.1002/aic.15537	WOS:000400656700004
	72	Sampaio, APC; de Sousa, MDM; Castro, ALA; de Figueiredo, MCB	Life cycle assessment from early development stages: the case of gelatin extracted from tilapia residues	INTERNATIONAL JOURNAL OF LIFE CYCLE ASSESSMENT	1	1	0948-3349	1614-7502	MAY	2017	22	5	767	783		10.1007/s11367-016-1179-5	WOS:000399246100010
	73	Houzelot, V; Laubie, B; Pontvianne, S; Simonnot, MO	Effect of up-scaling on the quality of ashes obtained from hyperaccumulator biomass to recover Ni by agromining	CHEMICAL ENGINEERING RESEARCH & DESIGN	6	6	0263-8762	1744-3563	APR	2017	120		26	33		10.1016/j.cherd.2017.02.002	WOS:000400220700003
	74	Kumar, G; Sivagurunathan, P; Sen, B; Mudhoo, A; Davila-Vazquez, G; Wang, GY; Kim, SH	Research and and development perspectives of lignocellulose-based biohydrogen production	INTERNATIONAL BIODETERIORATION & BIODEGRADATION	11	11	0964-8305	1879-0208	APR	2017	119		225	238		10.1016/j.ibiod.2016.10.030	WOS:000399511700023
	75	Robertson, AD; Whitaker, J; Morrison, R; Davies, CA; Smith, P; Mcnamara, NP	A Miscanthus plantation can be carbon neutral without increasing soil carbon stocks	GLOBAL CHANGE BIOLOGY BIOENERGY	1	1	1757-1693	1757-1707	MAR	2017	9	3	645	661		10.1111/gcbb.12397	WOS:000402740900011
	76	Hesser, F; Mihalic, M; Paichl, BJ; Wagner, M	Injection moulding unit process for LCA: Energy intensity of manufacturing different materials at different scales	JOURNAL OF REINFORCED PLASTICS AND COMPOSITES	0	0	0731-6844	1530-7964	MAR	2017	36	5	338	346		10.1177/0731684416674565	WOS:000400152900002
	77	Hesser, F; Wohner, B; Meints, T; Stern, T; Windsperger, A	Integration of LCA in R&D by applying the concept of payback period: case study of a modified multilayer wood parquet	INTERNATIONAL JOURNAL OF LIFE CYCLE ASSESSMENT	4	4	0948-3349	1614-7502	MAR	2017	22	3	307	316		10.1007/s11367-016-1173-y	WOS:000394352200001
	78	Pini, M; Gonzalez, EIC; Neri, P; Siligardi, C; Ferrari, AM	Assessment of Environmental Performance of TiO2 Nanoparticles Coated Self-Cleaning Float Glass	COATINGS	5	5	2079-6412		JAN	2017	7	1			8	10.3390/coatings7010008	WOS:000395504700008
	79	Randhawa, KS; Relph, LE; Armstrong, MC; Rahman, PKSM	Biofuel production: tapping into microalgae despite challenges	BIOFUELS-UK	3	3	1759-7269	1759-7277		2017	8	2	261	271		10.1080/17597269.2016.1224290	WOS:000396672600010
	80	Bizjak, KF; Knez, F; Lenart, S; Slanc, K	Life-cycle assessment and repair of the railway transition zones of an existing bridge using geocomposite materials	STRUCTURE AND INFRASTRUCTURE ENGINEERING	3	3	1573-2479	1744-8980		2017	13	3	331	344		10.1080/15732479.2016.1158288	WOS:000392824800002
	81	Bobba, S; Deorsola, FA; Blengini, GA; Fino, D	LCA of tungsten disulphide (WS2) nano-particles synthesis: state of art and from-cradle-to-gate LCA	JOURNAL OF CLEANER PRODUCTION	4	4	0959-6526	1879-1786	2015-12-01	2016	139		1478	1484		10.1016/j.jclepro.2016.07.091	WOS:000386991600133
	82	Michailos, S; Parker, D; Webb, C	A multicriteria comparison of utilizing sugar cane bagasse for methanol to gasoline and butanol production	BIOMASS & BIOENERGY	3	3	0961-9534	1873-2909	DEC	2016	95		436	448		10.1016/j.biombioe.2016.06.019	WOS:000389288900045
	83	Tsang, MP; Sonnemann, GW; Bassani, DM	Life-cycle assessment of cradle-to-grave opportunities and environmental impacts of organic photovoltaic solar panels compared to conventional technologies	SOLAR ENERGY MATERIALS AND SOLAR CELLS	9	9	0927-0248	1879-3398	NOV	2016	156		37	48		10.1016/j.solmat.2016.04.024	WOS:000383304100005
	84	Piccinno, F; Hischier, R; Seeger, S; Som, C	From laboratory to industrial scale: a scale-up framework for chemical processes in life cycle assessment studies	JOURNAL OF CLEANER PRODUCTION	24	24	0959-6526	1879-1786	2001-11-01	2016	135		1085	1097		10.1016/j.jclepro.2016.06.164	WOS:000382792900093
	85	Swain, CK; Bhattacharyya, P; Singh, NR; Neogi, S; Sahoo, RK; Nayak, AK; Zhang, G; Leclerc, MY	Net ecosystem methane and carbon dioxide exchange in relation to heat and carbon balance in lowland tropical rice	ECOLOGICAL ENGINEERING	6	6	0925-8574	1872-6992	OCT	2016	95		364	374		10.1016/j.ecoleng.2016.06.053	WOS:000385371400042
	86	Trolard, F; Bourrie, G; Baillieux, A; Buis, S; Chanzy, A; Clastre, P; Closet, JF; Courault, D; Dangeard, ML; Di Virgilio, N; Dussouilliez, P; Fleury, J; Gasc, J; Geniaux, G; Jouan, R; Keller, C; Lecharpentier, P; Lecroart, J; Napoleone, C; Mohammed, G; Olioso, A; Reynders, S; Rossi, F; Tennant, M; Lopez, JD	The PRECOS framework: Measuring the impacts of the global changes on soils, water, agriculture on territories to better anticipate the future	JOURNAL OF ENVIRONMENTAL MANAGEMENT	4	4	0301-4797	1095-8630	OCT 1	2016	181		590	601		10.1016/j.jenvman.2016.07.002	WOS:000383291700063	27423772
	87	Bunnak, P; Allmendinger, R; Ramasamy, V; Lettieri, P; Titchener-Hooker, NJ	Life-cycle and cost of goods assessment of fed-batch and perfusion-based manufacturing processes for mAbs	BIOTECHNOLOGY PROGRESS	7	7	8756-7938	1520-6033	SEP-OCT	2016	32	5	1324	1335		10.1002/btpr.2323	WOS:000387787600027	27390260
	88	Said, A; Laukkanen, T; Jarvinen, M	Pilot-scale experimental work on carbon dioxide sequestration using steelmaking slag	APPLIED ENERGY	6	6	0306-2619	1872-9118	2001-09-01	2016	177		602	611		10.1016/j.apenergy.2016.05.136	WOS:000380623900050
	89	Villares, M; Isildar, A; Beltran, AM; Guinee, J	Applying an ex-ante life cycle perspective to metal recovery from e-waste using bioleaching	JOURNAL OF CLEANER PRODUCTION	11	11	0959-6526	1879-1786	2015-08-01	2016	129		315	328		10.1016/j.jclepro.2016.04.066	WOS:000378183900030
	90	Simon, B; Bachtin, K; Kilic, A; Amor, B; Weil, M	Proposal of a framework for scale-up life cycle inventory: A case of nanofibers for lithium iron phosphate cathode applications	INTEGRATED ENVIRONMENTAL ASSESSMENT AND MANAGEMENT	3	3	1551-3777	1551-3793	JUL	2016	12	3	465	477		10.1002/ieam.1788	WOS:000379549300009	27123602
	91	Gouveia, L; Graca, S; Sousa, C; Ambrosano, L; Ribeiro, B; Botrel, EP; Neto, PC; Ferreira, AF; Silva, CM	Microalgae biomass production using wastewater: Treatment and costs Scale-up considerations	ALGAL RESEARCH-BIOMASS BIOFUELS AND BIOPRODUCTS	31	31	2211-9264		JUN	2016	16		167	176		10.1016/j.algal.2016.03.010	WOS:000375610000019
	92	Troy, S; Schreiber, A; Reppert, T; Gehrke, HG; Finsterbusch, M; Uhlenbruck, S; Stenzel, P	Life Cycle Assessment and resource analysis of all-solid-state batteries	APPLIED ENERGY	10	10	0306-2619	1872-9118	MAY 1	2016	169		757	767		10.1016/j.apenergy.2016.02.064	WOS:000374196200061
	93	Beucker, S; Bergesen, JD; Gibon, T	Building Energy Management Systems: Global Potentials and Environmental Implications of Deployment	JOURNAL OF INDUSTRIAL ECOLOGY	6	6	1088-1980	1530-9290	APR	2016	20	2	223	233		10.1111/jiec.12378	WOS:000374334400003
	94	Gunkaya, Z; Banar, M	An environmental comparison of biocomposite film based on orange peel-derived pectin jelly-corn starch and LDPE film: LCA and biodegradability	INTERNATIONAL JOURNAL OF LIFE CYCLE ASSESSMENT	4	4	0948-3349	1614-7502	APR	2016	21	4	465	475		10.1007/s11367-016-1042-8	WOS:000372324200004
	95	Clarens, F; Espi, JJ; Giraldi, MR; Rovira, M; Vega, LF	Life cycle assessment of CaO looping versus amine-based absorption for capturing CO2 in a subcritical coal power plant	INTERNATIONAL JOURNAL OF GREENHOUSE GAS CONTROL	8	8	1750-5836	1878-0148	MAR	2016	46		18	27		10.1016/j.ijggc.2015.12.031	WOS:000371837000003
	96	Vergara, SE; Damgaard, A; Gomez, D	The Efficiency of Informality: Quantifying Greenhouse Gas Reductions from Informal Recycling in Bogota, Colombia	JOURNAL OF INDUSTRIAL ECOLOGY	10	10	1088-1980	1530-9290	FEB	2016	20	1	107	119		10.1111/jiec.12257	WOS:000371484400010
	97	Tecchio, P; Freni, P; De Benedetti, B; Fenouillot, F	Ex-ante Life Cycle Assessment approach developed for a case study on bio-based polybutylene succinate	JOURNAL OF CLEANER PRODUCTION	6	6	0959-6526	1879-1786	2020-01-01	2016	112		316	325		10.1016/j.jclepro.2015.07.090	WOS:000368206700033
	98	Gifford, M; Chester, M; Hristovski, K; Westerhoff, P	Reducing environmental impacts of metal (hydr)oxide nanoparticle embedded anion exchange resins using anticipatory life cycle assessment	ENVIRONMENTAL SCIENCE-NANO	5	5	2051-8153	2051-8161		2016	3	6	1351	1360		10.1039/c6en00191b	WOS:000391423400012
	99	Cuellar-Franca, RM; Garcia-Gutierrez, P; Taylor, SFR; Hardacre, C; Azapagic, A	A novel methodology for assessing the environmental sustainability of ionic liquids used for CO2 capture	FARADAY DISCUSSIONS	8	8	1359-6640	1364-5498		2016	192		283	301		10.1039/c6fd00054a	WOS:000386310900016	27498650
	100	Tsang, M; Philippot, G; Aymonier, C; Sonnemann, G	Anticipatory life-cycle assessment of supercritical fluid synthesis of barium strontium titanate nanoparticles	GREEN CHEMISTRY	12	12	1463-9262	1463-9270		2016	18	18	4924	4933		10.1039/c6gc00646a	WOS:000383999300014
	101	Peters, J; Buchholz, D; Passerini, S; Weil, M	Life cycle assessment of sodium-ion batteries	ENERGY & ENVIRONMENTAL SCIENCE	43	43	1754-5692	1754-5706		2016	9	5	1744	1751		10.1039/c6ee00640j	WOS:000375699500018
	102	Berrill, P; Arvesen, A; Scholz, Y; Gils, HC; Hertwich, EG	Environmental impacts of high penetration renewable energy scenarios for Europe	ENVIRONMENTAL RESEARCH LETTERS	17	17	1748-9326		JAN	2016	11	1			14012	10.1088/1748-9326/11/1/014012	WOS:000368803800015
	103	Gnansounou, E; Raman, JK	Life cycle assessment of algae biodiesel and its co-products	APPLIED ENERGY	52	53	0306-2619	1872-9118	2001-01-01	2016	161		300	308		10.1016/j.apenergy.2015.10.043	WOS:000366063100024
	104	Kyriakopoulou, K; Papadaki, S; Krokida, M	Life cycle analysis of beta-carotene extraction techniques	JOURNAL OF FOOD ENGINEERING	9	9	0260-8774	1873-5770	DEC	2015	167		51	58		10.1016/j.jfoodeng.2015.03.008	WOS:000362856300009
	105	Mattick, CS; Landis, AE; Allenby, BR; Genovese, NJ	Anticipatory Life Cycle Analysis of In Vitro Biomass Cultivation for Cultured Meat Production in the United States	ENVIRONMENTAL SCIENCE & TECHNOLOGY	21	21	0013-936X	1520-5851	OCT 6	2015	49	19	11941	11949		10.1021/acs.est.5b01614	WOS:000362629100079	26383898
	106	Manda, BMK; Worrell, E; Patel, MK	Prospective life cycle assessment of an antibacterial T-shirt and supporting business decisions to create value	RESOURCES CONSERVATION AND RECYCLING	8	8	0921-3449	1879-0658	OCT	2015	103		47	57		10.1016/j.resconrec.2015.07.010	WOS:000362618600005
	107	Slater, CS; Savelski, MJ; Kostetskyy, P; Johnson, M	Shear-enhanced microfiltration of microalgae in a vibrating membrane module	CLEAN TECHNOLOGIES AND ENVIRONMENTAL POLICY	6	6	1618-954X	1618-9558	OCT	2015	17	7	1743	1755		10.1007/s10098-015-0907-z	WOS:000361392800003
	108	Luz, FC; Rocha, MH; Lora, EES; Venturini, OJ; Andrade, RV; Leme, MMV; del Olmo, OA	Techno-economic analysis of municipal solid waste gasification for electricity generation in Brazil	ENERGY CONVERSION AND MANAGEMENT	37	39	0196-8904	1879-2227	OCT	2015	103		321	337		10.1016/j.enconman.2015.06.074	WOS:000359873300033
	109	Hesser, F	Environmental advantage by choice: Ex-ante LCA for a new Kraft pulp fibre reinforced polypropylene composite in comparison to reference materials	COMPOSITES PART B-ENGINEERING	10	10	1359-8368	1879-1069	2015-09-01	2015	79		197	203		10.1016/j.compositesb.2015.04.038	WOS:000358808300022
	110	Slotte, M; Metha, G; Zevenhoven, R	Life cycle indicator comparison of copper, silver, zinc and aluminum nanoparticle production through electric arc evaporation or chemical reduction	INTERNATIONAL JOURNAL OF ENERGY AND ENVIRONMENTAL ENGINEERING	6	6	2008-9163	2251-6832	SEP	2015	6	3	233	243		10.1007/s40095-015-0171-3	WOS:000359419200003
	111	Bacenetti, J; Duca, D; Negri, M; Fusi, A; Fiala, M	Mitigation strategies in the agro-food sector: The anaerobic digestion of tomato puree by-products. An Italian case study	SCIENCE OF THE TOTAL ENVIRONMENT	28	28	0048-9697	1879-1026	2001-09-01	2015	526		88	97		10.1016/j.scitotenv.2015.04.069	WOS:000356224100010	25918896
	112	Fouquet, M; Levasseur, A; Margni, M; Lebert, A; Lasvaux, S; Souyri, B; Buhe, C; Woloszyn, M	Methodological challenges and developments in LCA of low energy buildings: Application to biogenic carbon and global warming assessment	BUILDING AND ENVIRONMENT	38	38	0360-1323	1873-684X	AUG	2015	90		51	59		10.1016/j.buildenv.2015.03.022	WOS:000356189000005
	113	Sfez, S; Van Den Hende, S; Taelman, SE; De Meester, S; Dewulf, J	Environmental sustainability assessment of a microalgae raceway pond treating aquaculture wastewater: From up-scaling to system integration	BIORESOURCE TECHNOLOGY	14	16	0960-8524	1873-2976	AUG	2015	190		321	331		10.1016/j.biortech.2015.04.088	WOS:000355200200042	25965258
	114	Zimmermann, BM; Dura, H; Baumann, MJ; Weil, MR	Prospective Time-Resolved LCA of Fully Electric Supercap Vehicles in Germany	INTEGRATED ENVIRONMENTAL ASSESSMENT AND MANAGEMENT	2	2	1551-3777	1551-3793	JUL	2015	11	3	425	434		10.1002/ieam.1646	WOS:000357019400012	25891858
	115	Rinaldi, C; Masoni, P; Salvati, F; Tolve, P	Life Cycle Assessment of Innovative Technology for Energy Production from Automotive Shredder Residue	INTEGRATED ENVIRONMENTAL ASSESSMENT AND MANAGEMENT	1	1	1551-3777	1551-3793	JUL	2015	11	3	435	444		10.1002/ieam.1659	WOS:000357019400013	25930669
	116	Raman, JK; Gnansounou, E	LCA of bioethanol and furfural production from vetiver	BIORESOURCE TECHNOLOGY	10	10	0960-8524	1873-2976	JUN	2015	185		202	210		10.1016/j.biortech.2015.02.096	WOS:000353190500027	25770467
	117	Fernandez-Dacosta, C; Posada, JA; Kleerebezem, R; Cuellar, MC; Ramirez, A	Microbial community-based polyhydroxyalkanoates (PHAs) production from wastewater: Techno-economic analysis and ex-ante environmental assessment	BIORESOURCE TECHNOLOGY	25	25	0960-8524	1873-2976	JUN	2015	185		368	377		10.1016/j.biortech.2015.03.025	WOS:000353190500049	25796067
	118	Hayward, JA; O'Connell, DA; Raison, RJ; Warden, AC; O'Connor, MH; Murphy, HT; Booth, TH; Braid, AL; Crawford, DF; Herr, A; Jovanovic, T; Poole, ML; Prestwidge, D; Raisbeck-Brown, N; Rye, L	The economics of producing sustainable aviation fuel: a regional case study in Queensland, Australia	GLOBAL CHANGE BIOLOGY BIOENERGY	11	12	1757-1693	1757-1707	MAY	2015	7	3	497	511		10.1111/gcbb.12159	WOS:000353100900008
	119	Miller, SA; Keoleian, GA	Framework for Analyzing Transformative Technologies in Life Cycle Assessment	ENVIRONMENTAL SCIENCE & TECHNOLOGY	20	21	0013-936X	1520-5851	MAR 3	2015	49	5	3067	3075		10.1021/es505217a	WOS:000350611100061	25636136
	120	Fridrihsone-Girone, A	Preliminary Life Cycle Inventory of Rapeseed Oil Polyols for Polyurethane Production	JOURNAL OF RENEWABLE MATERIALS	0	0	2164-6325	2164-6341	MAR	2015	3	1	28	33		10.7569/JRM.2014.634136	WOS:000365666700005
	121	Florent, Q; Enrico, B	Combining Agent-Based Modeling and Life Cycle Assessment for the Evaluation of Mobility Policies	ENVIRONMENTAL SCIENCE & TECHNOLOGY	7	7	0013-936X	1520-5851	2003-02-01	2015	49	3	1744	1751		10.1021/es5060868	WOS:000349060300062	25587896
	122	Gavankar, S; Suh, S; Keller, AA	The Role of Scale and Technology Maturity in Life Cycle Assessment of Emerging Technologies A Case Study on Carbon Nanotubes	JOURNAL OF INDUSTRIAL ECOLOGY	34	34	1088-1980	1530-9290	FEB	2015	19	1	51	60		10.1111/jiec.12175	WOS:000350284700008
	123	Locatelli, G; Boarin, S; Pellegrino, F; Ricotti, ME	Load following with Small Modular Reactors analysis (SMR): A real options analysis	ENERGY	17	17	0360-5442	1873-6785	2001-02-01	2015	80		41	54		10.1016/j.energy.2014.11.040	WOS:000349723500005
	124	Yang, Y; Suh, S	Marginal yield, technological advances, and emissions timing in corn ethanol's carbon payback time	INTERNATIONAL JOURNAL OF LIFE CYCLE ASSESSMENT	9	9	0948-3349	1614-7502	FEB	2015	20	2	226	232		10.1007/s11367-014-0827-x	WOS:000348138000007
	125	Alves, L; Paixao, SM; Pacheco, R; Ferreira, AF; Silva, CM	Biodesulphurization of fossil fuels: energy, emissions and cost analysis	RSC ADVANCES	10	10	2046-2069			2015	5	43	34047	34057		10.1039/c4ra14216k	WOS:000353167500043
	126	Hendrickson, TP; Kavvada, O; Shah, N; Sathre, R; Scown, CD	Life-cycle implications and supply chain logistics of electric vehicle battery recycling in California	ENVIRONMENTAL RESEARCH LETTERS	15	15	1748-9326		JAN	2015	10	1			14011	10.1088/1748-9326/10/1/014011	WOS:000348501800012
	127	Masanet, E; Chang, Y	Who Cares About Life Cycle Assessment? A Survey of 900 Prospective Life Cycle Assessment Practitioners	JOURNAL OF INDUSTRIAL ECOLOGY	4	4	1088-1980	1530-9290	DEC	2014	18	6	787	791		10.1111/jiec.12189	WOS:000346268500002
	128	Laure, S; Leschinsky, M; Frohling, M; Schultmann, F; Unkelbach, G	ASSESSMENT OF AN ORGANOSOLV LIGNOCELLULOSE BIOREFINERY CONCEPT BASED ON A MATERIAL FLOW ANALYSIS OF A PILOT PLANT	CELLULOSE CHEMISTRY AND TECHNOLOGY	30	30	0576-9787		NOV-DEC	2014	48	2019-10-09	793	798			WOS:000348615900005
	129	Mann, SA; de Wild-Scholten, MJ; Fthenakis, VM; van Sark, WGJHM; Sinke, WC	The energy payback time of advanced crystalline silicon PV modules in 2020: a prospective study	PROGRESS IN PHOTOVOLTAICS	33	33	1062-7995	1099-159X	NOV	2014	22	11	1180	1194		10.1002/pip.2363	WOS:000343755000008
	130	Wender, BA; Foley, RW; Prado-Lopez, V; Ravikumar, D; Eisenberg, DA; Hottle, TA; Sadowski, J; Flanagan, WP; Fisher, A; Laurin, L; Bates, ME; Linkov, I; Seager, TP; Fraser, MP; Guston, DH	Illustrating Anticipatory Life Cycle Assessment for Emerging Photovoltaic Technologies	ENVIRONMENTAL SCIENCE & TECHNOLOGY	39	41	0013-936X	1520-5851	2016-09-01	2014	48	18	10531	10538		10.1021/es5016923	WOS:000341801500002	25121583
	131	De Soete, W; Boone, L; Willemse, F; De Meyer, E; Heirman, B; Van Langenhove, H; Dewulf, J	Environmental resource footprinting of drug manufacturing: Effects of scale-up and tablet dosage	RESOURCES CONSERVATION AND RECYCLING	8	8	0921-3449	1879-0658	SEP	2014	91		82	88		10.1016/j.resconrec.2014.08.002	WOS:000343392300008
	132	Bomberg, M; Sanchez, DL; Lipman, TE	Optimizing fermentation process miscanthus-to-ethanol biorefinery scale under uncertain conditions	ENVIRONMENTAL RESEARCH LETTERS	1	1	1748-9326		JUN	2014	9	6			64018	10.1088/1748-9326/9/6/064018	WOS:000341825200020
	133	Arvidsson, R; Kushnir, D; Sanden, BA; Molander, S	Prospective Life Cycle Assessment of Graphene Production by Ultrasonication and Chemical Reduction	ENVIRONMENTAL SCIENCE & TECHNOLOGY	39	41	0013-936X	1520-5851	2015-04-01	2014	48	8	4529	4536		10.1021/es405338k	WOS:000334658400035	24646298
	134	Illner, S; Plagemann, R; Saling, P; Kragl, U	Eco-efficiency analysis as a reaction-engineering tool-Case study of a laccase-initiated oxidative C-N coupling	JOURNAL OF MOLECULAR CATALYSIS B-ENZYMATIC	3	3	1381-1177	1873-3158	APR	2014	102		106	114		10.1016/j.molcatb.2014.01.015	WOS:000335872900015
	135	Li, BB; Gao, XF; Li, JY; Yuan, C	Life Cycle Environmental Impact of High-Capacity Lithium Ion Battery with Silicon Nanowires Anode for Electric Vehicles	ENVIRONMENTAL SCIENCE & TECHNOLOGY	39	41	0013-936X	1520-5851	MAR 4	2014	48	5	3047	3055		10.1021/es4037786	WOS:000332494200063	24483341
	136	Schrijvers, DL; Leroux, F; Verney, V; Patel, MK	Ex-ante life cycle assessment of polymer nanocomposites using organo-modified layered double hydroxides for potential application in agricultural films	GREEN CHEMISTRY	16	16	1463-9262	1463-9270		2014	16	12	4969	4984		10.1039/c4gc00830h	WOS:000345455100017
	137	Hetherington, AC; Borrion, AL; Griffiths, OG; McManus, MC	Use of LCA as a development tool within early research: challenges and issues across different sectors	INTERNATIONAL JOURNAL OF LIFE CYCLE ASSESSMENT	42	42	0948-3349	1614-7502	JAN	2014	19	1	130	143		10.1007/s11367-013-0627-8	WOS:000330319000014
	138	Wender, BA; Foley, RW; Hottle, TA; Sadowski, J; Prado-Lopez, V; Eisenberg, DA; Laurin, L; Seager, TP	Anticipatory life-cycle assessment for responsible research and innovation	JOURNAL OF RESPONSIBLE INNOVATION	30	32	2329-9460	2329-9037		2014	1	2	200	207		10.1080/23299460.2014.920121	WOS:000410066000005
	139	Wang, XQ; Nordlander, E; Thorin, E; Yan, JY	Microalgal biomethane production integrated with an existing biogas plant: A case study in Sweden	APPLIED ENERGY	23	23	0306-2619	1872-9118	DEC	2013	112		478	484		10.1016/j.apenergy.2013.04.087	WOS:000329377800049
	140	Passell, H; Dhaliwal, H; Reno, M; Wu, B; Ben Amotz, A; Ivry, E; Gay, M; Czartoski, T; Laurin, L; Ayer, N	Algae biodiesel life cycle assessment using current commercial data	JOURNAL OF ENVIRONMENTAL MANAGEMENT	60	60	0301-4797	1095-8630	2015-11-01	2013	129		103	111		10.1016/j.jenvman.2013.06.055	WOS:000327904400013	23900083
	141	Torres, CM; Rios, SD; Torras, C; Salvado, J; Mateo-Sanz, JM; Jimenez, L	Microalgae-based biodiesel: A multicriteria analysis of the production process using realistic scenarios	BIORESOURCE TECHNOLOGY	29	29	0960-8524	1873-2976	NOV	2013	147		7	16		10.1016/j.biortech.2013.07.145	WOS:000326660900002	23981268
	142	Kralisch, D; Ott, D; Kressirer, S; Staffel, C; Sell, I; Krtschil, U; Loeb, P	Bridging sustainability and intensified flow processing within process design for sustainable future factories	GREEN PROCESSING AND SYNTHESIS	9	9	2191-9542	2191-9550	OCT	2013	2	5	465	478		10.1515/gps-2013-0058	WOS:000333448200009
	143	D'Errico, F; Plaza, GG; Giger, F; Kim, SK	Final Assessment of Preindustrial Solid-State Route for High-Performance Mg-System Alloys Production: Concluding the EU Green Metallurgy Project	JOM	3	3	1047-4838		OCT	2013	65	10	1293	1302		10.1007/s11837-013-0705-1	WOS:000324097700005
	144	Hessel, V; Cravotto, G; Fitzpatrick, P; Patil, BS; Lang, J; Bonrath, W	Industrial applications of plasma, microwave and ultrasound techniques: Nitrogen-fixation and hydrogenation reactions	CHEMICAL ENGINEERING AND PROCESSING	33	34	0255-2701	1873-3204	SEP	2013	71		19	30		10.1016/j.cep.2013.02.002	WOS:000327285000003
	145	Scown, CD; Taptich, M; Horvath, A; McKone, TE; Nazaroff, WW	Achieving Deep Cuts in the Carbon Intensity of US Automobile Transportation by 2050: Complementary Roles for Electricity and Biofuels	ENVIRONMENTAL SCIENCE & TECHNOLOGY	12	12	0013-936X		2020-08-01	2013	47	16	9044	9052		10.1021/es4015635	WOS:000323471700007	23906086
	146	Zhai, P; Haussener, S; Ager, J; Sathre, R; Walczak, K; Greenblatt, J; McKone, T	Net primary energy balance of a solar-driven photoelectrochemical water-splitting device	ENERGY & ENVIRONMENTAL SCIENCE	38	38	1754-5692		AUG	2013	6	8	2380	2389		10.1039/c3ee40880a	WOS:000321983800010
	147	Omidvarnia, F; Islam, A; Hansen, HN; Olsen, SI	A comparative study on life cycle assessment of micro and macro components	INTERNATIONAL JOURNAL OF ADVANCED MANUFACTURING TECHNOLOGY	1	1	0268-3768		JUL	2013	67	2019-08-05	1171	1189		10.1007/s00170-012-4557-6	WOS:000321915800016
	148	Slade, R; Bauen, A	Micro-algae cultivation for biofuels: Cost, energy balance, environmental impacts and future prospects	BIOMASS & BIOENERGY	293	297	0961-9534	1873-2909	JUN	2013	53		29	38		10.1016/j.biombioe.2012.12.019	WOS:000320905500005
	149	Dale, M; Benson, SM	Energy Balance of the Global Photovoltaic (PV) Industry - Is the PV Industry a Net Electricity Producer?	ENVIRONMENTAL SCIENCE & TECHNOLOGY	51	51	0013-936X		2002-04-01	2013	47	7	3482	3489		10.1021/es3038824	WOS:000317173100060	23441588
	150	LeCorre, D; Hohenthal, C; Dufresne, A; Bras, J	Comparative Sustainability Assessment of Starch Nanocrystals	JOURNAL OF POLYMERS AND THE ENVIRONMENT	12	12	1566-2543		MAR	2013	21	1	71	80		10.1007/s10924-012-0447-0	WOS:000314886900009
	151	Gao, T; Jelle, BP; Sandberg, LIC; Gustavsen, A	Monodisperse Hollow Silica Nanospheres for Nano Insulation Materials: Synthesis, Characterization, and Life Cycle Assessment	ACS APPLIED MATERIALS & INTERFACES	60	61	1944-8244		2013-02-01	2013	5	3	761	767		10.1021/am302303b	WOS:000315079700039	23327194
	152	Pietrzykowski, M; Flanagan, W; Pizzi, V; Brown, A; Sinclair, A; Monge, M	An environmental life cycle assessment comparison of single-use and conventional process technology for the production of monoclonal antibodies	JOURNAL OF CLEANER PRODUCTION	12	12	0959-6526		FEB	2013	41		150	162		10.1016/j.jclepro.2012.09.048	WOS:000315062400017
	153	Griffiths, OG; Owen, RE; O'Byrne, JP; Mattia, D; Jones, MD; McManus, MC	Using life cycle assessment to measure the environmental performance of catalysts and directing research in the conversion of CO2 into commodity chemicals: a look at the potential for fuels from 'thin-air'	RSC ADVANCES	14	14	2046-2069			2013	3	30	12244	12254		10.1039/c3ra41900b	WOS:000321623200041
	154	de Figueiredo, MCB; Rosa, MD; Ugaya, CML; de Souza, MDM; Braid, ACCD; de Melo, LFL	Life cycle assessment of cellulose nanowhiskers	JOURNAL OF CLEANER PRODUCTION	24	25	0959-6526		NOV	2012	35		130	139		10.1016/j.jclepro.2012.05.033	WOS:000307415700013
	155	Pihl, E; Kushnir, D; Sanden, B; Johnsson, F	Material constraints for concentrating solar thermal power	ENERGY	37	37	0360-5442	1873-6785	AUG	2012	44	1	944	954		10.1016/j.energy.2012.04.057	WOS:000308259300091
	156	Fthenakis, V	Sustainability metrics for extending thin-film photovoltaics to terawatt levels	MRS BULLETIN	29	30	0883-7694		APR	2012	37	4	425	430		10.1557/mrs.2012.50	WOS:000302472500016
	157	Sevigne-Itoiz, E; Fuentes-Grunewald, C; Gasol, CM; Garces, E; Alacid, E; Rossi, S; Rieradevall, J	Energy balance and environmental impact analysis of marine microalgal biomass production for biodiesel generation in a photobioreactor pilot plant	BIOMASS & BIOENERGY	24	25	0961-9534	1873-2909	APR	2012	39		324	335		10.1016/j.biombioe.2012.01.026	WOS:000302829900040
	158	Busset, G; Sangely, M; Montrejaud-Vignoles, M; Thannberger, L; Sablayrolles, C	Life cycle assessment of polychlorinated biphenyl contaminated soil remediation processes	INTERNATIONAL JOURNAL OF LIFE CYCLE ASSESSMENT	13	13	0948-3349	1614-7502	MAR	2012	17	3	325	336		10.1007/s11367-011-0366-7	WOS:000303384500008
	159	Sathre, R; Chester, M; Cain, J; Masanet, E	A framework for environmental assessment of CO2 capture and storage systems	ENERGY	39	39	0360-5442		JAN	2012	37	1	540	548		10.1016/j.energy.2011.10.050	WOS:000300465800053
	160	Whitman, T; Yanni, SF; Whalen, JK	Life cycle assessment of corn stover production for cellulosic ethanol in Quebec	CANADIAN JOURNAL OF SOIL SCIENCE	15	15	0008-4271		NOV	2011	91	6	997	1012		10.4141/CJSS2011-011	WOS:000299248100009
	161	Mishra, GS; Glassley, WE; Yeh, S	Realizing the geothermal electricity potential-water use and consequences	ENVIRONMENTAL RESEARCH LETTERS	3	3	1748-9326		JUL-SEP	2011	6	3			34023	10.1088/1748-9326/6/3/034023	WOS:000295327900026
	162	Middelhoff, U; Reiche, EW; Windhorst, W	An integrative methodology to predict dispersal of genetically modified genotypes in oilseed rape at landscape-level-A study for the region of Schleswig-Holstein, Germany	ECOLOGICAL INDICATORS	9	10	1470-160X		JUL	2011	11	4	1000	1007		10.1016/j.ecolind.2009.03.008	WOS:000289324200008
	163	Espinosa, N; Garcia-Valverde, R; Krebs, FC	Life-cycle analysis of product integrated polymer solar cells	ENERGY & ENVIRONMENTAL SCIENCE	66	66	1754-5692		MAY	2011	4	5	1547	1557		10.1039/c1ee01127h	WOS:000289989800001
	164	Kim, HC; Fthenakis, VM	Comparative life-cycle energy payback analysis of multi-junction a-SiGe and nanocrystalline/a-Si modules	PROGRESS IN PHOTOVOLTAICS	10	10	1062-7995	1099-159X	MAR	2011	19	2	228	239		10.1002/pip.990	WOS:000288135300015
	165	Gustavsson, L; Sathre, R	Energy and CO2 analysis of wood substitution in construction	CLIMATIC CHANGE	41	42	0165-0009		MAR	2011	105	2019-02-01	129	153		10.1007/s10584-010-9876-8	WOS:000287508700007
	166	Garcia-Valverde, R; Cherni, JA; Urbina, A	Life cycle analysis of organic photovoltaic technologies	PROGRESS IN PHOTOVOLTAICS	85	85	1062-7995		NOV	2010	18	7	535	558		10.1002/pip.967	WOS:000283479700007
	167	Harto, C; Meyers, R; Williams, E	Life cycle water use of low-carbon transport fuels	ENERGY POLICY	78	80	0301-4215		SEP	2010	38	9	4933	4944		10.1016/j.enpol.2010.03.074	WOS:000279743500019
	168	Poechlauer, P; Braune, S; De Vries, A; May, O	Sustainable route design for pharmaceuticals Why, how and when	CHIMICA OGGI-CHEMISTRY TODAY	8	9	0392-839X		JUL-AUG	2010	28	4	14	17			WOS:000282012500005
	169	Lebel, L; Mungkung, R; Gheewala, SH; Lebel, P	Innovation cycles, niches and sustainability in the shrimp aquaculture industry in Thailand	ENVIRONMENTAL SCIENCE & POLICY	41	42	1462-9011		JUN	2010	13	4	291	302		10.1016/j.envsci.2010.03.005	WOS:000279666300004
	170	Evans, JM; Cohen, MJ	Regional water resource implications of bioethanol production in the Southeastern United States	GLOBAL CHANGE BIOLOGY	39	41	1354-1013	1365-2486	SEP	2009	15	9	2261	2273		10.1111/j.1365-2486.2009.01868.x	WOS:000268684200012
	171	Beuger, V; Kunkele, KP; Koll, H; Gartner, A; Bahner, M; Burtscher, H; Klein, C	Short-hairpin-RNA-mediated silencing of fucosyltransferase 8 in Chinese-hamster ovary cells for the production of antibodies with enhanced antibody immune effector function	BIOTECHNOLOGY AND APPLIED BIOCHEMISTRY	10	12	0885-4513	1470-8744	MAY	2009	53		31	37		10.1042/BA20080220	WOS:000265988700002	19032154
	172	Weinzettel, J; Reenaas, M; Solli, C; Hertwich, EG	Life cycle assessment of a floating offshore wind turbine	RENEWABLE ENERGY	101	106	0960-1481		MAR	2009	34	3	742	747		10.1016/j.renene.2008.04.004	WOS:000265085900037
	173	Villegas, JD; Gnansounou, E	Techno-economic and environmental evaluation of lignocellulosic biochemical refineries: need for a modular platform for integrated assessment (MPIA)	JOURNAL OF SCIENTIFIC & INDUSTRIAL RESEARCH	8	8	0022-4456		NOV	2008	67	11	927	940			WOS:000260906400010
	174	Spielmann, M; de Haan, P; Scholz, RW	Environmental rebound effects of high-speed transport technologies: a case study of climate change rebound effects of a future underground maglev train system	JOURNAL OF CLEANER PRODUCTION	26	26	0959-6526			2008	16	13	1388	1398		10.1016/j.jclepro.2007.08.001	WOS:000257642100007
	175	Raugei, M; Bargigli, S; Ulgiati, S	Life cycle assessment and energy pay-back time of advanced photovoltaic modules: CdTe and CIS compared to poly-Si	ENERGY	165	167	0360-5442		AUG	2007	32	8	1310	1318		10.1016/j.energy.2006.10.003	WOS:000247662200002
	176	Viebahn, P; Nitsch, J; Fischedick, M; Esken, A; Schuwer, D; Supersberger, N; Zuberbuhler, U; Edenhofer, O	Comparison of carbon capture and storage with renewable energy technologies regarding structural, economic, and ecological aspects in Germany	INTERNATIONAL JOURNAL OF GREENHOUSE GAS CONTROL	112	120	1750-5836		APR	2007	1	1	121	133		10.1016/S1750-5836(07)00024-2	WOS:000256440600017
	177	Kralisch, D; Kreisel, G	Assessment of the ecological potential of microreaction technology	CHEMICAL ENGINEERING SCIENCE	38	38	0009-2509		FEB	2007	62	4	1094	1100		10.1016/j.ces.2006.11.009	WOS:000243813900017
	178	Li, Y; Griffing, E; Higgins, M; Overcash, M	Life cycle assessment of soybean oil production	JOURNAL OF FOOD PROCESS ENGINEERING	17	17	0145-8876		AUG	2006	29	4	429	445		10.1111/j.1745-4530.2006.00069.x	WOS:000238888000009
	179	Spielmann, M; Scholz, RW; Tietje, O; de Haan, P	Scenario modelling in prospective LCA of transport systems - Application of formative scenario analysis	INTERNATIONAL JOURNAL OF LIFE CYCLE ASSESSMENT	41	41	0948-3349		SEP	2005	10	5	325	335		10.1065/lca2004.10.188	WOS:000231766700005
	180	Ekvall, T; Tillman, AM; Molander, S	Normative ethics and methodology for life cycle assessment	JOURNAL OF CLEANER PRODUCTION	77	79	0959-6526			2005	13	13-14	1225	1234		10.1016/j.jclepro.2005.05.010	WOS:000231137100003
	181	Stichnothe, H; Calmano, W; Arevalo, E; Keller, A; Thoming, J	TBT-contaminated sediments - Treatment in a pilot scale - Dedicated to Prof. Dr. Ulrich Forstner on his 65th birthday	JOURNAL OF SOILS AND SEDIMENTS	14	14	1439-0108			2005	5	1	21	29		10.1065/jss2005.01.128	WOS:000228520100005
	182	Lundie, S; Peters, GM; Beavis, PC	Life Cycle Assessment for sustainable metropolitan water systems planning	ENVIRONMENTAL SCIENCE & TECHNOLOGY	207	209	0013-936X		2001-07-01	2004	38	13	3465	3473		10.1021/es034206m	WOS:000222396400010	15296294
	183	Cederberg, C; Stadig, M	System expansion and allocation in life cycle assessment of milk and beef production	INTERNATIONAL JOURNAL OF LIFE CYCLE ASSESSMENT	181	190	0948-3349			2003	8	6	350	356		10.1065/lca2003.07.126	WOS:000186715400006
	184	Pereira, CJ	Environmentally friendly processes	CHEMICAL ENGINEERING SCIENCE	24	27	0009-2509		JUL	1999	54	13-14	1959	1973		10.1016/S0009-2509(98)00504-1	WOS:000080906200004

## Sheet: Review results
	Study	Application	Production capacity of a hypothetical up-scaled technology	Did a study specify TRL of the technology?	Did a study define more than 1 scenario for a hypothetical up-scaled technology?	Did a study provide a description of a hypothetical up-scaled technology?	Did a study present an LCA flowchart?	Did a study do sensitivity analysis?	Did a study do uncertainty analysis?
	Arvidsson & Molander (2017)	Chemistry	Not mentioned	No	Yes	Yes	Yes	Yes	No
	Cossutta et al. (2017)	Chemistry	Not mentioned	No	No	Yes	No	Yes	No
	Cuéllar-Franca et al. (2016)	Chemistry	Not mentioned	No	No	No	Yes	Yes	Yes
	Fernández-Dacosta et al. (2015)	Chemistry/waste treatment	Production of PHB = 1.5 ktonnes/year	No	Yes	Yes	No	Yes	No
	González-García et al. (2018a)	Chemistry/waste treatment	Not mentioned	No	Yes	Yes	Yes	Yes	No
	González-García et al. (2018b)	Chemistry	Not mentioned	No	No	Yes	Yes	Yes	No
	Mattick et al. (2015)	Food	Production of invitro biomass for cultured meat = 66000 kg/year	No	No	Yes	Yes	Yes	Yes
	Mazzoni et al. (2019)	Chemistry/waste treatment	Not mentioned	No	Yes	Yes	No	No	No
	Muñoz et al. (2019)	Waste treatment/energy	Waste water treatment plant designed for 5000 person-equivalents	No	Yes	Yes	No	Yes	No
	Piccinno et al. (2016)	Chemistry	Not mentioned	No	No	Yes a	No	No	No
	Piccinno et al. (2018)	Chemistry/waste treatment	Not mentioned	No	Yes	Yes	No	Yes	No
	Rinaldi et al. (2015)	Chemistry/waste treatment	Treatment of automotive shredder residue = 40 000 tonnes /year (i.e., 4.5 tons/h)	No	Yes	Yes	No	Yes	Yes
	Salas et al. (2018)	Building sector	Production of concrete blocks = 144000/month	No	Yes	Yes	Yes	Yes	No
	Khojasteh Salkuyeh et al. (2017)	Chemistry	Production of hydrogen = 18.9 tonnes/hour	No	No	Yes	Yes	yes	No
	Sampaio et al. (2017)	Waste treatment	Production of gelatin = 230 kg/year	No	No	Yes	Yes	No	No
	Schulze et al. (2018)	Waste treatment	Not mentioned	No	Yes	Yes	No	Yes	No
	Simon et al. (2016)	Chemistry	Not mentioned	No	No	Yes	No	Yes	No
	Villares et al. (2016)	Waste treatment	Treatment of PCB = 96,000 tonnes/year	No	No	Yes	Yes	Yes	No
	a the authors presented an up-scaling framework for chemical processes and applied the up-scaling framework to a fictional example of a technology

## Sheet: References
References
1	Arvidsson R, Molander S (2017) Prospective life cycle assessment of epitaxial graphene production at different manufacturing scales and maturity. J. Ind. Ecol. https://doi.org/10.1111/jiec.12526
2	Cossutta M, McKechnie J, Pickering SJ (2017) A comparative LCA of different graphene production routes. Green Chem. https://doi.org/10.1039/c7gc02444d
3	Cuéllar-Franca RM, García-Gutiérrez P, Taylor SFR, Hardacre C, Azapagic A (2016) A novel methodology for assessing the environmental sustainability of ionic liquids used for CO2 capture. Faraday Discussions. https://doi.org/10.1039/c6fd00054a
4	Fernández-Dacosta C, Posada JA, Kleerebezem R, Cuellar MC, Ramirez A (2015) Microbial community-based polyhydroxyalkanoates (PHAs) production from wastewater: Techno-economic analysis and ex-ante environmental assessment. Bioresour. Technol. 185:368–377. https://doi.org/10.1016/j.biortech.2015.03.025
5	González-García S, Argiz L, Míguez P, Gullón B (2018a) Exploring the production of bio-succinic acid from apple pomace using an environmental approach. Chem. Eng. J. https://doi.org/10.1016/j.cej.2018.06.052
6	González-García S, Morales PC, Gullón B (2018b) Estimating the environmental impacts of a brewery waste–based biorefinery: Bio-ethanol and xylooligosaccharides joint production case study. Ind. Crops Prod. https://doi.org/10.1016/j.indcrop.2018.07.003
7	Khojasteh Salkuyeh Y, Saville BA, MacLean HL (2017) Techno-economic analysis and life cycle assessment of hydrogen production from natural gas using current and emerging technologies. Int. J. Hydrogen Energy. https://doi.org/10.1016/j.ijhydene.2017.05.219
8	Mattick CS, Landis AE, Allenby BR, Genovese NJ (2015) Anticipatory Life Cycle Analysis of In Vitro Biomass Cultivation for Cultured Meat Production in the United States. Environ. Sci. Technol. 49(19):11941–11949. https://doi.org/10.1021/acs.est.5b01614
9	Mazzoni R, Cesari C, Zanotti V, Lucarelli C, Tabanelli T, Puzzo F, et al (2019) Catalytic Biorefining of Ethanol from Wine Waste to Butanol and Higher Alcohols: Modeling the Life Cycle Assessment and Process Design. ACS Sustain. Chem. Eng. https://doi.org/10.1021/acssuschemeng.8b02959
10	Muñoz I, Portillo F, Rosiek S, Batlles FJ, Martínez-Del-Río J, Acasuso I, et al (2019) Prospective environmental and economic assessment of solar-assisted thermal energy recovery from wastewater through a sequencing batch biofilter granular reactor. J. Clean. Prod. https://doi.org/10.1016/j.jclepro.2018.12.074
11	Piccinno F, Hischier R, Seeger S, Som C (2016) From laboratory to industrial scale: a scale-up framework for chemical processes in life cycle assessment studies. J. Clean. Prod. 135:1085–1097. https://doi.org/10.1016/j.jclepro.2016.06.164
12	Piccinno F, Hischier R, Seeger S, Som C (2018) Predicting the environmental impact of a future nanocellulose production at industrial scale: Application of the life cycle assessment scale-up framework. J. Clean. Prod. https://doi.org/10.1016/j.jclepro.2017.10.226
13	Rinaldi C, Masoni P, Salvati F, Tolve P (2015) Life cycle assessment of innovative technology for energy production from automotive shredder residue. Integr. Environ. Assess. Manag. https://doi.org/10.1002/ieam.1659
14	Salas DA, Ramirez AD, Ulloa N, Baykara H, Boero AJ (2018) Life cycle assessment of geopolymer concrete. Constr. Build. Mater. https://doi.org/10.1016/j.conbuildmat.2018.09.123
15	Sampaio APC, de Sá M de Sousa Filho M, Castro ALA, de Figueirêdo MCB (2017) Life cycle assessment from early development stages: the case of gelatin extracted from tilapia residues. Int. J. Life Cycle Assess. https://doi.org/10.1007/s11367-016-1179-5
16	Schulze R, Abbasalizadeh A, Bulach W, Schebek L, Buchert, M (2018) An Ex-ante LCA Study of Rare Earth Extraction from NdFeB Magnet Scrap Using Molten Salt Electrolysis. J. Sustain. Metall. 4(4):493–505. https://doi.org/10.1007/s40831-018-0198-9
17	Simon B, Bachtin K, Kiliç A, Amor B, Weil M (2016) Proposal of a framework for scale-up life cycle inventory: A case of nanofibers for lithium iron phosphate cathode applications. Integr. Environ. Assess. Manag. https://doi.org/10.1002/ieam.1788
18	Villares M, Işildar A, Mendoza Beltran A, Guinee J (2016) Applying an ex-ante life cycle perspective to metal recovery from e-waste using bioleaching. J. Clean. Prod. https://doi.org/10.1016/j.jclepro.2016.04.066
